# Supplementary material for: Three-dimensional N,B-doped graphene aerogel as a synergistically enhanced metal-free catalyst for the oxygen reduction reaction
Source: Royal Society of Chemistry journal article supplement (doi:10.1039/c5cp04211a), 2015-01-01
Supplement: c5cp04211a1.pdf [file c5cp04211a1.pdf]

## Supplementary Materials

Three-dimensional N, B-doped graphene aerogel as a synergistically enhanced metal-free catalyst for the oxygen reduction reaction

Congcong Xu,<sup>a</sup> Yan Su,<sup>a</sup> Dajun Liu,<sup>a</sup> Xingquan He<sup>\*a</sup>

*<sup>a</sup>Department of Chemistry and Chemical Engineering, Changchun University of Science and Technology, Changchun 130022, P. R. China.*

---

\* Corresponding author. Tel.+86-431-85583430

E-mail address:hexingquan@hotmail.com (Xingquan He)

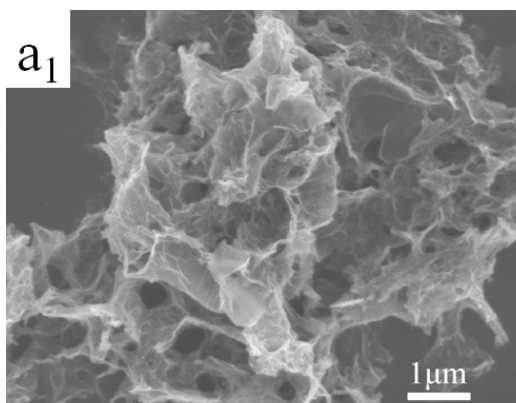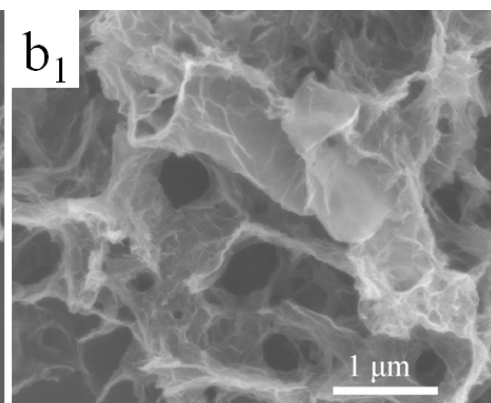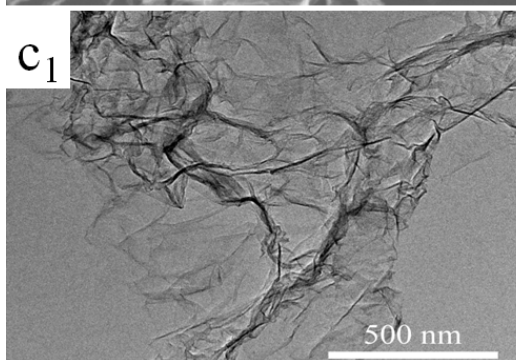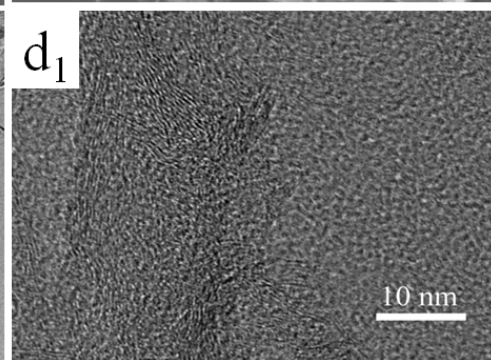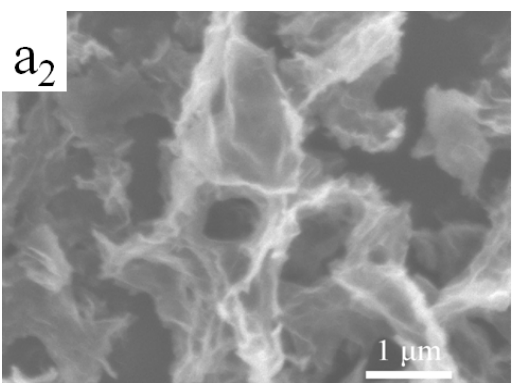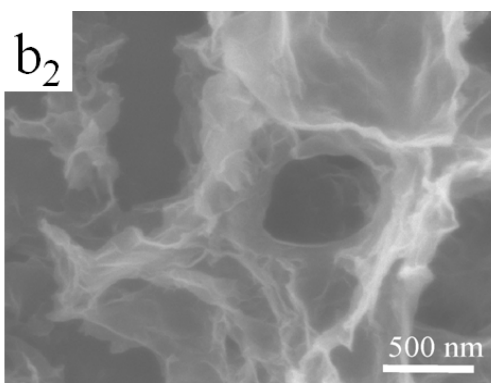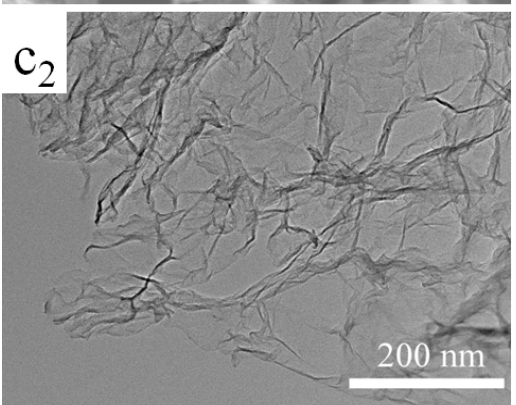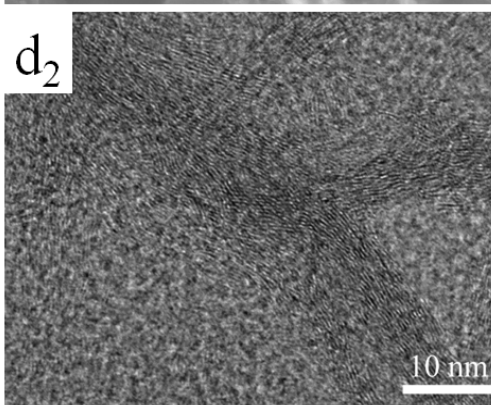

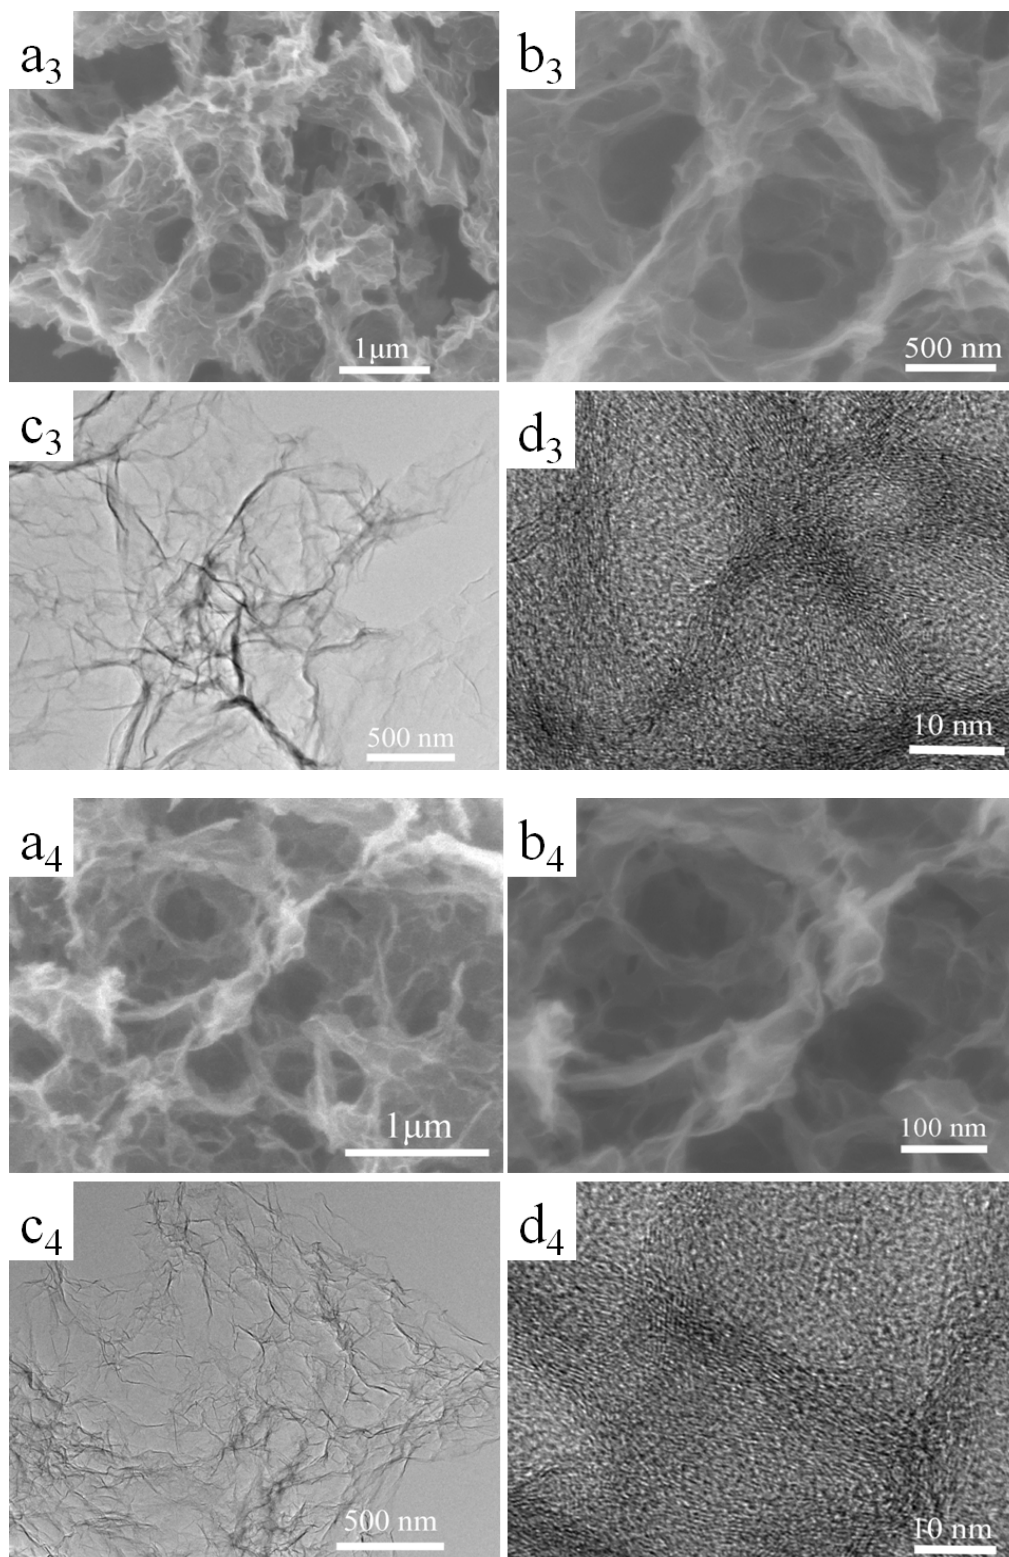

Fig. S1 SEM images of (a<sub>1</sub>, b<sub>1</sub>) N-GA, (a<sub>2</sub>, b<sub>2</sub>) B-GA, (a<sub>3</sub>, b<sub>3</sub>) N, B-GA-800 and (a<sub>4</sub>, b<sub>4</sub>) N, B-GA-900; TEM and HRTEM images of (c<sub>1</sub>, d<sub>1</sub>) N-GA, (c<sub>2</sub>, d<sub>2</sub>) B-GA, (c<sub>3</sub>, d<sub>3</sub>) N,

B-GA-800 and ( $c_4$ ,  $d_4$ ) N, B-GA-900.

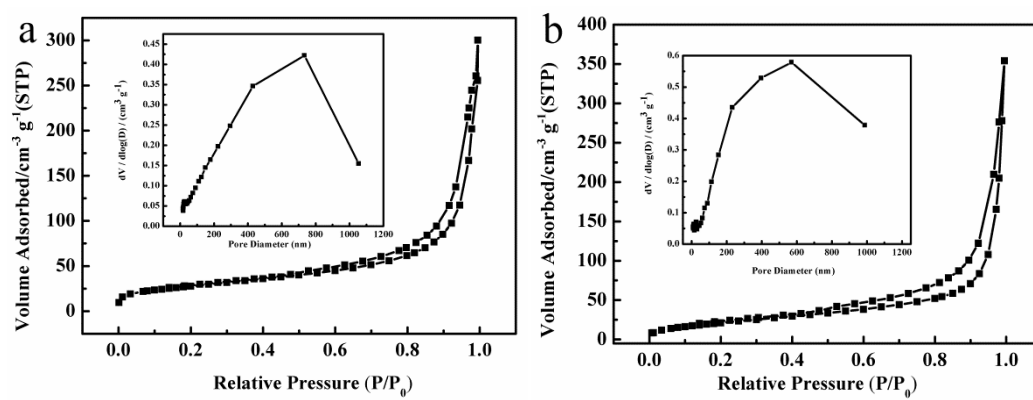

**Fig. S2** (a) Nitrogen adsorption-desorption isotherms of (a) B-GA (b) N-GA. The inset is the pore size distribution gained by the Barrett-Joyner-Halenda method.

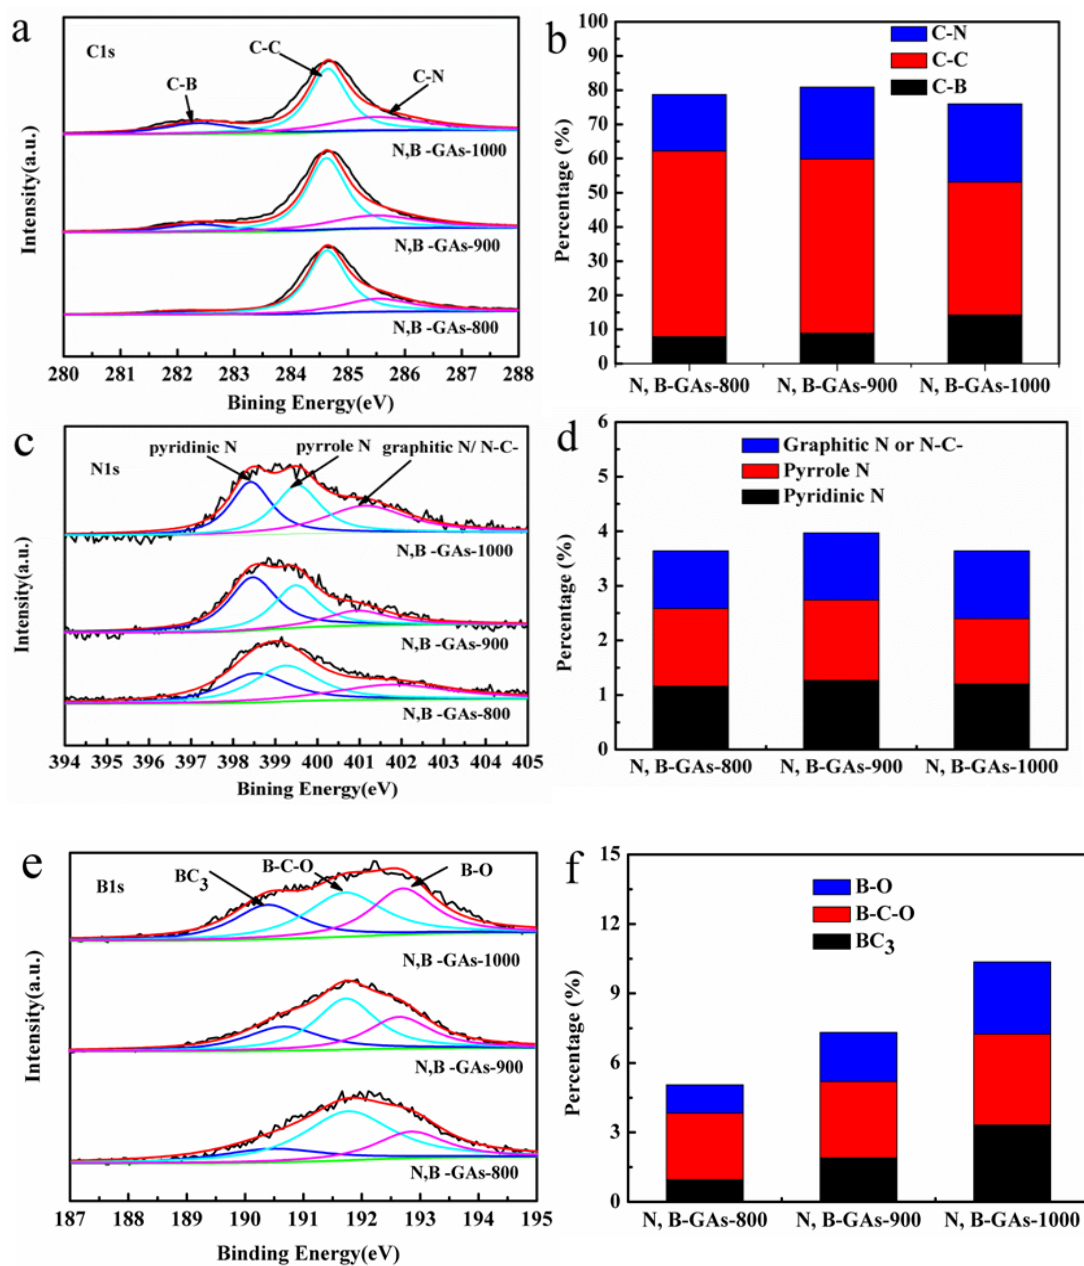

Fig. S3 (a, c, e) High-resolution C1s, N1s, and B1s XPS spectra of N, B-GA at different pyrolysis temperatures; (b) The atomic percentage of three carbon species in N, B-GA pyrolysed at different pyrolysis temperature; (d) The atomic percentage of three nitrogen species in N, B-GA pyrolysed at different pyrolysis temperature; (d) The atomic percentage of three boron species in N, B-GA pyrolysed at different

pyrolysis temperature.

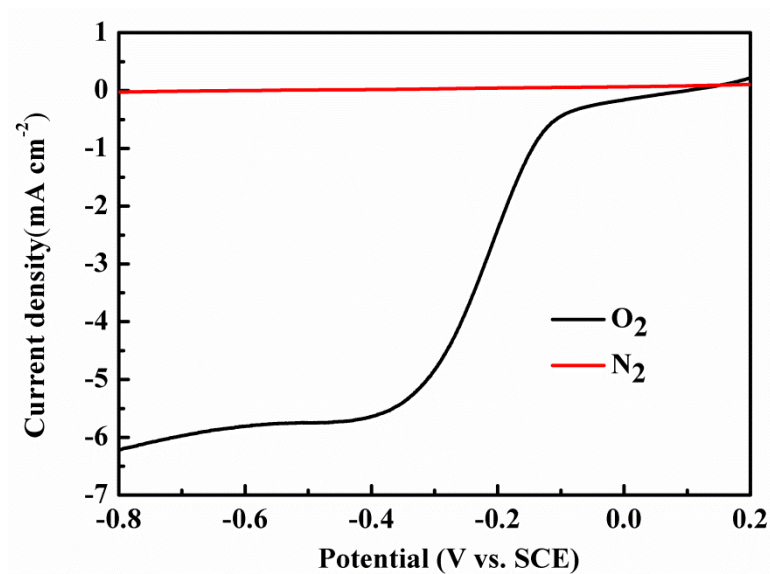

Fig. S4 LSV curves of N, B-GA-1000 in an  $O_2$  or  $N_2$ -saturated 0.1 M KOH solution at the rotation speed of 1600 rpm with the scan rate of  $10\ mV\ s^{-1}$ .

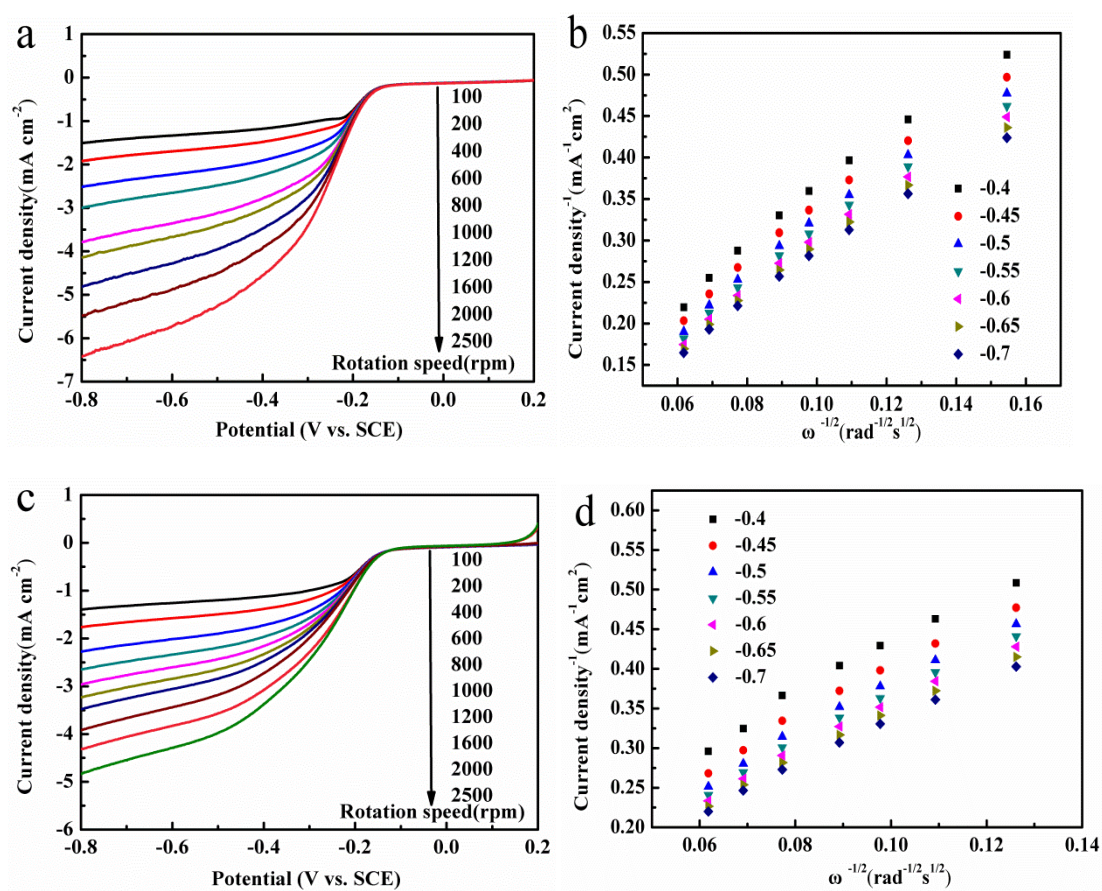



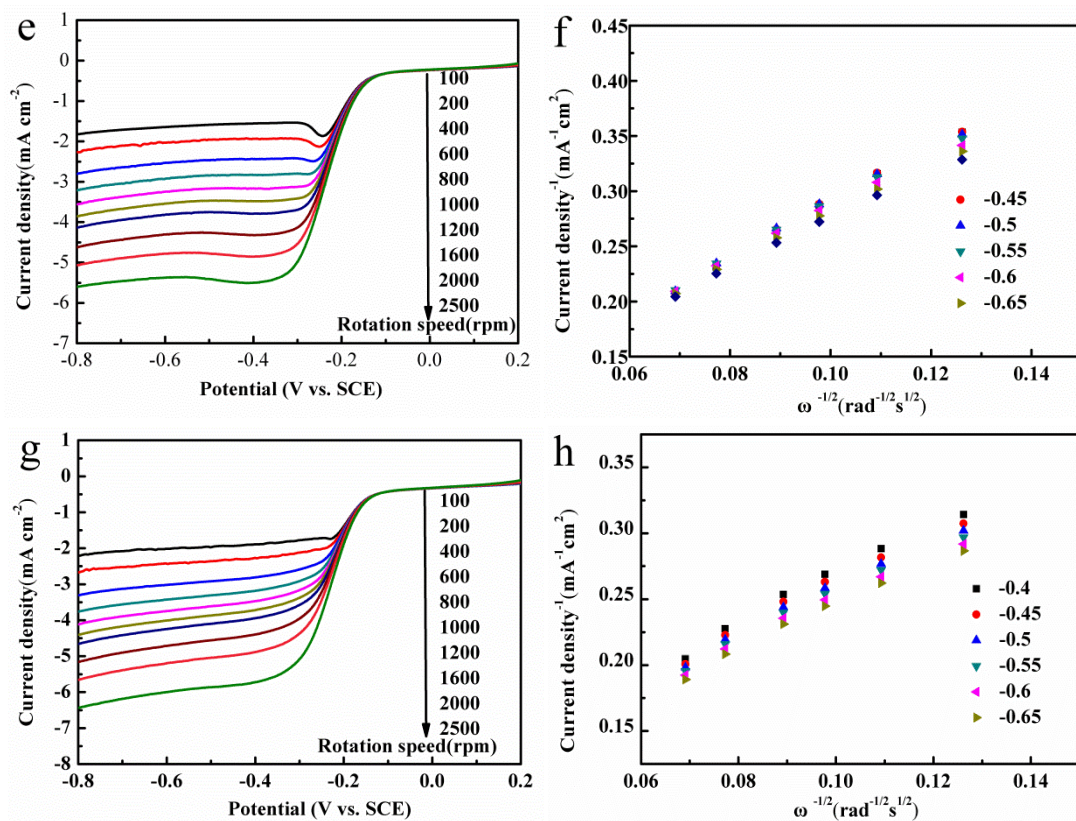

Fig. S5 LSV curves of (a) N-GA (c) B-GA (e) N, B-GA-800 and (g) N, B-GA-900 at different rotation speeds in  $\text{O}_2$ -saturated 0.1 M KOH with the scan rate of  $10 \text{ mV s}^{-1}$ ; K-L plots of (b) N-GA, (d) B-GA, (f) N, B-GA-800 and (h) N, B-GA-900 at fixed potentials of -0.4, -0.45, -0.5, -0.55, -0.6, -0.65, -0.7V.

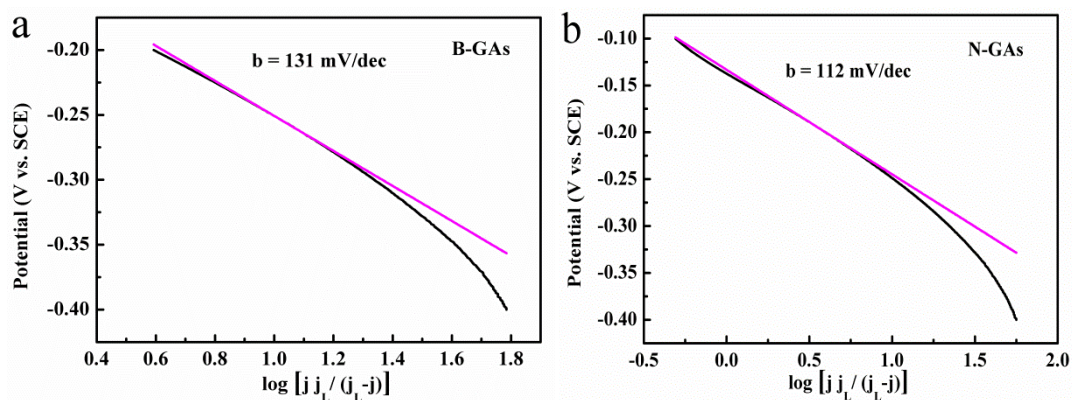

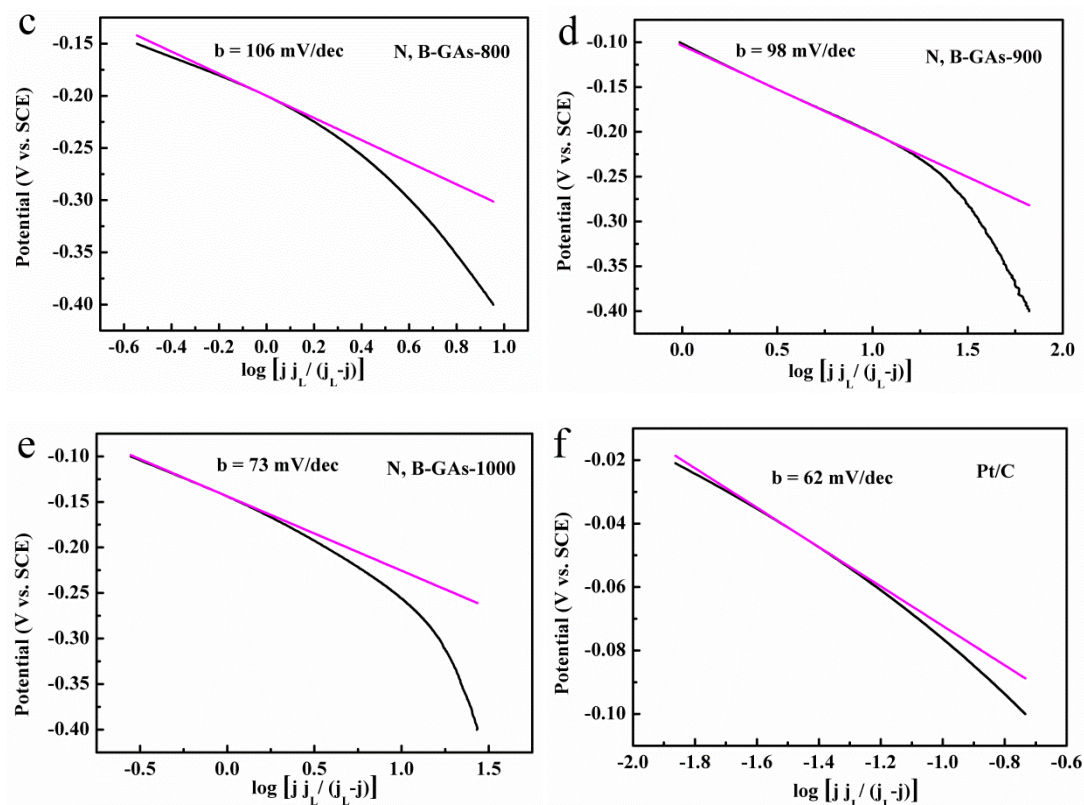

Fig. S6 Tafel plots obtained from RDE measurements on (a) B-GA, (b) N-GA, (c) N, B-GA-800, (d) N, B-GA-900, (e) N, B-GA-1000 and (f) Pt/C at 1600 rpm.

Table S1 Electrochemical parameters for the ORR estimated from LSVs

| materials    | Onset potential<br>(V vs. SCE) | $j_L$ (mA cm <sup>-2</sup> ) at -<br>0.8 V vs. SCE | Half wave potential<br>(V vs. SCE) | Tafel plot slopes<br>(mV dec <sup>-1</sup> ) |
|--------------|--------------------------------|----------------------------------------------------|------------------------------------|----------------------------------------------|
| B-GA         | -0.14                          | 3.94                                               | -0.31                              | 131                                          |
| N-GA         | -0.14                          | 4.82                                               | -0.27                              | 112                                          |
| N, B-GA-800  | -0.12                          | 4.62                                               | -0.22                              | 106                                          |
| N, B-GA-900  | -0.11                          | 5.15                                               | -0.23                              | 98                                           |
| N, B-GA-1000 | -0.07                          | 6.20                                               | -0.21                              | 73                                           |
| Pt/C         | -0.02                          | 5.21                                               | -0.17                              | 62                                           |
